# Supplementary material
Source: publisher figshare collection journal article supplement (https://tandf.figshare.com/ndownloader/files/33644955)
Supplement: Supplementary file 1 [file 33644955]

**SUPPLEMENTARY MATERIAL**

*Danish data sources*

Danish datasets relevant to studying perinatal mental health among others include the Danish National Birth Cohort, the Danish Psychiatric Central Research Register (PCRR), and the iPSYCH study (The Lundbeck Foundation Initiative for Integrative Psychiatric Research) which was linked to the Danish Psychiatric Central Research Register. These datasets can be linked with other data sources through the Danish Civil Registration System (CRS) using the unique personal identification number (CRS number).

The Danish National Birth Cohort, a large nationwide cohort of pregnant women with long-term follow-up of the offspring, started in 1996 and subsequently covered all regions in Denmark in 1999 (n=60,000 pregnant women by August 2000) (1). Information was collected by computer-assisted telephone interviews with the women twice during pregnancy and when their children were six and 18 months old. Participants were also asked to complete a self-administered food frequency questionnaire in mid-pregnancy, and a bio-bank has also been established containing blood samples from the mother twice during pregnancy and blood from the umbilical cord after childbirth. Additional follow-up information on the children has been collected at ages six months, 18 months old and later on.

The Danish CRS register holds information on each individual in Denmark and is constructed using a unique personal identification number (CRS number), which is assigned to all Danes and is used across every Danish national register (2). This personal identifier allows for accurate linkage of information between and within the registers. The CRS was established in 1968 and contains information on CRS number, gender, date of birth, updated vital status, data on all legal children, and CRS numbers of parents.

The Danish Psychiatric Central Research Register (PCRR) computerized in 1969, contains information on all admissions to Danish psychiatric inpatient facilities (3). Data covering outpatient contacts were added to the register in 1995, and all diagnoses are recorded using the ICD-8 and ICD-10 system. The registry provides information on psychiatric inpatient and outpatient contacts for the entire population and hence holds information on mother’s mental health, as well as mental health of identified partner and family members.

Lastly, the iPSYCH study (The Lundbeck Foundation Initiative for Integrative Psychiatric Research) which was linked to the Danish Psychiatric Central Research Register is nested within the entire Danish population including individuals born between 1981 and 2005 (4). Cases were identified as persons with schizophrenia (n=3,540), autism (n=16,146), attention-deficit/hyperactivity disorder (n=18,726) and affective disorder (n=26,380), of which 1,928 had bipolar affective disorder. Controls were randomly sampled individuals (n=30,000), applying a case-cohort design. DNA was extracted from the neonatal dried blood spot samples obtained from the Danish Neonatal Screening Biobank and genotyped using the Illumina Psych Chip. Through register-linkage, longitudinal information is also available on health, prescription drug use, social and socioeconomic information, and analogous information among relatives.

*Norwegian data sources*

Norwegian datasets on perinatal mental health include the Norwegian Mother, Father and Child cohort study (MoBa), the Brainmint project (Brains and minds in transition: The dark side of neuroplasticity during sensitive life phases) and the Akershus Birth Cohort (ABC) study. By using the unique identification number given to all residents in Norway, participants in the above-mentioned studies can be linked to health registries, such as the Medical Birth Registry of Norway (MBRN), the Norwegian Patient Registry (NPR), the Norwegian Registry for Primary Care and the Norwegian Prescription Database (NorPD).

The MoBa study is a population-based cohort study conducted by the Norwegian Institute of Public Health. The overall objective of MoBa is to test specific etiological hypotheses by estimating the associations between exposure and diseases, with an aim of prevention. MoBa aimed to include all pregnant women in Norway with recruitment sites at 50 of the 52 hospitals with maternity units in Norway. The women were recruited at the routine fetal ultrasound examination at 17-18 weeks of gestation. The cohort includes more than 114 000 children, 95 000 mothers and 75 000 fathers (5). The first child was born in October 1999 and the last in July 2009. Blood samples (DNA, RNA, whole blood, plasma) were obtained from both parents during pregnancy and from mothers and children (umbilical cord) after birth. During pregnancy, the mother responded to three questionnaires and the father to one. After birth, questionnaires were sent out when the child was 6 months, 18 months and 3, 5, 7, 8 and 13 years old.

The Brainmint project uses neuroimaging/ brain imaging data aiming to zero in on major life transitions, which are characterized by temporarily increased brain plasticity, offering windows for adaptation and growth, but which also host the emergence of common mental disorders. A multi-level investigation with this dark side of brain plasticity is expected to add a mechanistic understanding of this link between growth and vulnerability (6).

The ABC longitudinal Study targeted all pregnant women giving birth at Akershus University Hospital, Norway between November 2008 and April 2010 (n=6,244 women) (7). The hospital serves approximately 400,000 people from both urban and rural areas. Women were recruited at the routine fetal ultrasound examination at 17-18 weeks of gestation. Pregnant women who were able to complete a questionnaire in Norwegian were eligible. Data were collected by self-administered questionnaires in pregnancy weeks 17 (Q1) and 32 (Q2), and 8 weeks (Q3) and 2 years (Q4) after delivery. Additional information was obtained by linkage to the electronic clinical birth records. The questionnaire-based data include a wide range of mental health measures alongside detailed obstetrical outcome variables.

*Swedish data sources*

In Sweden, examples of longitudinal population-based datasets on perinatal mental health include the Biology, Affect, Stress, Imaging, Cognition (BASIC) study (www.basicstudie.se), the U-BIRTH follow-up study (www.ubirth.se), the Postpartum Depression: Action Towards Causes and Treatment (PACT) Swedish sub-study (www.pactstudie.se) and the Mom2B mobile application-based cohort study (www.mom2b.se).

The BASIC study is a population-based longitudinal study on psychological wellbeing during pregnancy and the postpartum period in Uppsala County, Sweden (8). The study was conducted at the Department of Obstetrics and Gynecology, Uppsala University Hospital during 2009-2019. All pregnant women over the age of 18 in Uppsala County who attended their routine ultra-sound in gestational week 16-18 were invited to participate in the study. The BASIC study recruited more than 5,700 individual participants, reporting longitudinally on 6,748 pregnancies, while also contributing with biological samples obtained in late pregnancy, at delivery and early postpartum. Variables include background characteristics, socioeconomic parameters, lifestyle, social support, early life trauma, resilience, personality and attachment style, stressful life events, pregnancy and delivery variables, breastfeeding and sleep, among others.

The U-BIRTH, initiated in 2012, is an ongoing follow-up study on the BASIC participants and their children’s psychoemotional development up to 11 years of age (n=3,000 children) (8).

The PACT Swedish study is part of the international PACT consortium initiated in 2010 and comprising data from 19 international sites in seven countries (9). Participants retrospectively report on previous depression in the postnatal period, provide saliva samples for genetic analyses and are recruited from several settings including psychiatric clinics, obstetric clinics, primary care, and community advertisements.

The Mom2B study (www.mom2b.se) is a national ongoing mobile application-based cohort of pregnant women, anticipated to recruit 20,000 Swedish women between November 2019 and June 2024 (n=3,000 participants have already entered the study). All Swedish-speaking women above 18 years of age owning a mobile smartphone who are either pregnant or have delivered within three months are eligible for participation. This novel study is a continuation of the work within the BASIC study in that the self-report instruments included are based on results from the BASIC cohort. The Beiwe research platform source from the Harvard School of Public Health was used as a basis for developing the Mom2B application (10). The Mom2B app aims at novel multimodal assessments, including the self-report measures mentioned above for the BASIC study, but also activity in social media, use of the internet and the phone and mobility data (i.e., GPS data) collected passively through the app, as well as voice recordings, following informed consent. Privacy protection was central in the design of the application; for example, data is collected only on relative geographical movement patterns (rather than exact position of participant) and patterns in posting and liking in social media (rather than the content of the posts). Data will also be linked to national registers and to data on sociodemographic information, sick-leave, diagnoses and medication. The latter data will be available for linkage to the Mom2B cohort for a period of 7 years after study inclusion.

Lastly, information on perinatal mental health in Sweden is further derived from the Swedish Registers through linkage to the Pregnancy Register and the Medical Birth Register (11, 12). All Swedish Registers are linked to the Statistics Sweden (SCB) and the National Board of Health and Welfare with the use of the 10-digit National Registration Number, a unique personal identifier assigned to all Swedish residents, which allows between-register linkage; to secure anonymity all personal identifiers are replaced with consecutive numbers, when they are retrieved from the Registers (12).

**Supplementary References**

1. Olsen J, Melbye M, Olsen SF, Sorensen TI, Aaby P, Andersen AM, et al. The Danish National Birth Cohort--its background, structure and aim. Scand J Public Health. 2001;29(4):300-7.

2. Pedersen CB. The Danish Civil Registration System. Scand J Public Health. 2011;39(7 Suppl):22-5.

3. Mors O, Perto GP, Mortensen PB. The Danish Psychiatric Central Research Register. Scand J Public Health. 2011;39(7 Suppl):54-7.

4. Pedersen CB, Bybjerg-Grauholm J, Pedersen MG, Grove J, Agerbo E, Baekvad-Hansen M, et al. The iPSYCH2012 case-cohort sample: new directions for unravelling genetic and environmental architectures of severe mental disorders. Mol Psychiatry. 2018;23(1):6-14.

5. Magnus P, Birke C, Vejrup K, Haugan A, Alsaker E, Daltveit AK, et al. Cohort Profile Update: The Norwegian Mother and Child Cohort Study (MoBa). Int J Epidemiol. 2016;45(2):382-8.

6. Alnaes D, Kaufmann T, Doan NT, Cordova-Palomera A, Wang Y, Bettella F, et al. Association of Heritable Cognitive Ability and Psychopathology With White Matter Properties in Children and Adolescents. JAMA Psychiatry. 2018;75(3):287-95.

7. Garthus-Niegel S, Ayers S, von Soest T, Torgersen L, Eberhard-Gran M. Maintaining factors of posttraumatic stress symptoms following childbirth: A population-based, two-year follow-up study. J Affect Disord. 2015; 1;172:146-52.

8. Axfors C, Brann E, Henriksson HE, Hellgren C, Kunovac Kallak T, Fransson E, et al. Cohort profile: the Biology, Affect, Stress, Imaging and Cognition (BASIC) study on perinatal depression in a population-based Swedish cohort. BMJ Open. 2019;9(10):e031514.

9. Putnam KT, Wilcox M, Robertson-Blackmore E, Sharkey K, Bergink V, Munk-Olsen T, et al. Clinical phenotypes of perinatal depression and time of symptom onset: analysis of data from an international consortium. Lancet Psychiatry. 2017;4(6):477-85.

10. Berry JD, Paganoni S, Carlson K, Burke K, Weber H, Staples P, et al. Design and results of a smartphone-based digital phenotyping study to quantify ALS progression. Ann Clin Transl Neurol. 2019;6(5):873-81.

11. Ludvigsson JF, Almqvist C, Bonamy AK, Ljung R, Michaelsson K, Neovius M, et al. Registers of the Swedish total population and their use in medical research. Eur J Epidemiol. 2016;31(2):125-36.

12. Ludvigsson JF, Andersson E, Ekbom A, Feychting M, Kim JL, Reuterwall C, et al. External review and validation of the Swedish national inpatient register. BMC Public Health. 2011;11:450.
